# Supplementary material
Source: publisher figshare collection journal article supplement (https://sage.figshare.com/ndownloader/files/20718243)
Supplement: Supplementary file 1 [file 20718243]

**Supplementary Table 1. Gender distribution among types of practitioners interviewed.**

|  | Social workers | Psychotherapists | Psychiatrists | Program coordinators | Policymakers | Total |
| --- | --- | --- | --- | --- | --- | --- |
| Females | 20 | 13 | 2 | 6 | 1 | 42 |
| Males | 0 | 4 | 8 | 4 | 2 | 18 |
| Total | 20 | 17 | 10 | 10 | 3 | 60 |
